# Supplementary material for: Future changes in regional inter-monthly precipitation patterns of the East Asian summer monsoon and associated uncertainty factors
Source: Copernicus journal article supplement (doi:10.5194/esd-16-1135-2025), 2025-07-18
Supplement: Supplementary file 1 [file esd-16-1135-2025-supplement.pdf]

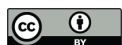

## *Supplement of*

# **Future changes in regional inter-monthly precipitation patterns of the East Asian summer monsoon and associated uncertainty factors**

**Yeon-Hee Kim and Seung-Ki Min**

*Correspondence to:* Seung-Ki Min ([skmin@postech.ac.kr](mailto:skmin@postech.ac.kr))

The copyright of individual parts of the supplement might differ from the article licence.

**Table S1. List of CMIP6 models used in this study**

| <b>Model</b>         | <b>Institution</b>                                                                                                                                                                                                                                                                                                                 | <b>Resolution<br/>(Long. × Lat.)</b> |
|----------------------|------------------------------------------------------------------------------------------------------------------------------------------------------------------------------------------------------------------------------------------------------------------------------------------------------------------------------------|--------------------------------------|
| <b>ACCESS-CM2</b>    | Commonwealth Scientific and Industrial Research Organisation and Australian Research Council Centre of Excellence for Climate System Science, Australia                                                                                                                                                                            | 192 × 144                            |
| <b>ACCESS-ESM1-5</b> |                                                                                                                                                                                                                                                                                                                                    | 192 × 145                            |
| <b>BCC-CSM2-MR</b>   | Beijing Climate Center, China Meteorological Administration, China                                                                                                                                                                                                                                                                 | 320 × 160                            |
| <b>CanESM5</b>       | Canadian Centre for Climate Modelling and Analysis, Canada                                                                                                                                                                                                                                                                         | 128 × 64                             |
| <b>CESM2</b>         | National Center for Atmospheric Research                                                                                                                                                                                                                                                                                           | 288 × 192                            |
| <b>CESM2-WACCM</b>   |                                                                                                                                                                                                                                                                                                                                    | 288 × 192                            |
| <b>CMCC-CM2-SR5</b>  | Fondazione Centro Euro-Mediterraneo sui Cambiamenti Climatici                                                                                                                                                                                                                                                                      | 288 × 192                            |
| <b>CNRM-CM6-1</b>    | Centre National de Recherches Météorologiques, Météo-France, France                                                                                                                                                                                                                                                                | 256 × 128                            |
| <b>CNRM-ESM2-1</b>   |                                                                                                                                                                                                                                                                                                                                    | 256 × 128                            |
| <b>EC-Earth3</b>     | EC-Earth-Consortium                                                                                                                                                                                                                                                                                                                | 512 × 256                            |
| <b>EC-Earth3-Veg</b> |                                                                                                                                                                                                                                                                                                                                    | 512 × 256                            |
| <b>FGOALS-g3</b>     | Chinese Academy of Sciences, China                                                                                                                                                                                                                                                                                                 | 180 × 80                             |
| <b>GFDL-ESM4</b>     | Geophysical Fluid Dynamics Laboratory, USA                                                                                                                                                                                                                                                                                         | 288 × 180                            |
| <b>INM-CM4-8</b>     | Institute for Numerical Mathematics, Russia                                                                                                                                                                                                                                                                                        | 180 × 120                            |
| <b>INM-CM5-0</b>     |                                                                                                                                                                                                                                                                                                                                    | 180 × 120                            |
| <b>IPSL-CM6A-LR</b>  | Institut Pierre-Simon Laplace, France                                                                                                                                                                                                                                                                                              | 144 × 143                            |
| <b>KACE-1-0-G</b>    | National Institute of Meteorological Science/Korea Meteorological Administration, Korea                                                                                                                                                                                                                                            | 192 × 144                            |
| <b>MIROC6</b>        | Atmosphere and Ocean Research Institute (AORI), National Institute for Environmental Studies (NIES), Japan Agency for Marine-Earth Science and Technology (JAMSTEC), RIKEN Center for Computational Science (R-CCS), Japan                                                                                                         | 256 × 128                            |
| <b>MIROC-ES2L</b>    |                                                                                                                                                                                                                                                                                                                                    | 128 × 64                             |
| <b>MPI-ESM1-2-HR</b> | Max Planck Institute for Meteorology, Germany                                                                                                                                                                                                                                                                                      | 384 × 192                            |
| <b>MPI-ESM1-2-LR</b> |                                                                                                                                                                                                                                                                                                                                    | 192 × 96                             |
| <b>MRI-ESM2-0</b>    | Meteorological Research Institute, Japan                                                                                                                                                                                                                                                                                           | 320 × 160                            |
| <b>NorESM2-LM</b>    | Norwegian Earth System Model (NorESM) climate modeling Consortium of the Center for International Climate Research (CICERO), Norwegian Meteorological Institute, National Energy Research Scientific Computing Center (NERSC), Norsk Institutt for Luftforskning (NILU), University of Bergen, University of Oslo, and UNI, Norway | 144 × 96                             |
| <b>NorESM2-MM</b>    |                                                                                                                                                                                                                                                                                                                                    | 288 × 192                            |
| <b>UKESM1-0-LL</b>   | Met Office Hadley Centre, UK                                                                                                                                                                                                                                                                                                       | 192 × 144                            |

**Table S2. List of CMIP5 models used in this study**

| <b>Model</b>               | <b>Institution</b>                                                                                                                                                              | <b>Resolution<br/>(Long. × Lat.)</b> |
|----------------------------|---------------------------------------------------------------------------------------------------------------------------------------------------------------------------------|--------------------------------------|
| <b>bcc-csm1-1</b>          | Beijing Climate Center, China Meteorological<br>Administration, China                                                                                                           | 128 × 64                             |
| <b>bcc-csm1-1-m</b>        |                                                                                                                                                                                 | 320 × 160                            |
| <b>BNU-ESM</b>             | Beijing Normal University, China                                                                                                                                                | 128 × 64                             |
| <b>CanESM2</b>             | Canadian Centre for Climate Modelling and Analysis,<br>Canada                                                                                                                   | 128 × 64                             |
| <b>CCSM4</b>               | National Center for Atmospheric Research (NCAR), USA                                                                                                                            | 288 × 192                            |
| <b>CNRM-CM5</b>            | Centre National de Recherches Météorologiques, Météo-<br>France, France                                                                                                         | 256 × 128                            |
| <b>CSIRO-Mk3-6-0</b>       | Australian Commonwealth Scientific and Industrial Research<br>Organization, Australia                                                                                           | 192 × 96                             |
| <b>FGOALS-g2</b>           | Institute of Atmospheric Physics, Chinese Academy of<br>Sciences, China                                                                                                         | 128 × 60                             |
| <b>GFDL-CM3</b>            | Geophysical Fluid Dynamics Laboratory, USA                                                                                                                                      | 144 × 90                             |
| <b>GFDL-ESM2G</b>          |                                                                                                                                                                                 | 144 × 90                             |
| <b>GFDL-ESM2M</b>          |                                                                                                                                                                                 | 144 × 90                             |
| <b>HadGEM2-AO</b>          | Met Office Hadley Centre, UK                                                                                                                                                    | 192 × 145                            |
| <b>HadGEM2-ES</b>          |                                                                                                                                                                                 | 192 × 145                            |
| <b>IPSL-CM5A-LR</b>        | Institut Pierre-Simon Laplace, France                                                                                                                                           | 96 × 96                              |
| <b>IPSL-CM5A-MR</b>        |                                                                                                                                                                                 | 144 × 143                            |
| <b>MIROC5</b>              | Atmosphere and Ocean Research Institute (AORI), National<br>Institute for Environmental Studies (NES), Japan Agency for<br>Marine-Earth Science and Technology (JAMSTEC), Japan | 256 × 128                            |
| <b>MIROC-ESM</b>           |                                                                                                                                                                                 | 128 × 64                             |
| <b>MIROC-ESM-<br/>CHEM</b> |                                                                                                                                                                                 | 128 × 64                             |
| <b>MPI-ESM-LR</b>          | Max Planck Institute for Meteorology, Germany                                                                                                                                   | 192 × 96                             |
| <b>MPI-ESM-MR</b>          |                                                                                                                                                                                 | 192 × 96                             |
| <b>MRI-CGCM3</b>           | Meteorological Research Institute, Japan                                                                                                                                        | 320 × 160                            |
| <b>NorESM1-M</b>           | Norwegian Climate Centre, Norway                                                                                                                                                | 144 × 96                             |

**Table S3. Relative contribution (RC, %) of internal variability (I), model uncertainty (M), and scenario uncertainty (S) to variance in total projection uncertainty for near-term (NT), mid-term (MT) and long-term (LT) projections of precipitation change over East Asia (EA), China (CHA), Korea (KOR) and Japan (JAP)**

| Monsoon<br>Rainband<br>Index | Model | RC | EA   |      |      | CHA  |      |      | KOR  |      |      | JAP  |      |      |
|------------------------------|-------|----|------|------|------|------|------|------|------|------|------|------|------|------|
|                              |       |    | NT   | MT   | LT   |
| Northward<br>Migration       | CMIP6 | M  | 60.0 | 70.9 | 63.8 | 59.2 | 66.4 | 65.5 | 63.7 | 69.6 | 66.8 | 59.7 | 68.1 | 68.1 |
|                              |       | S  | 0.6  | 0.3  | 18.8 | 0.1  | 0.1  | 14.0 | 0.3  | 1.1  | 9.7  | 0.2  | 0.6  | 4.5  |
|                              |       | I  | 39.4 | 28.8 | 17.4 | 40.7 | 33.5 | 20.6 | 36.0 | 29.2 | 23.6 | 40.1 | 31.4 | 27.5 |
|                              | CMIP5 | M  | 67.1 | 72.8 | 76.7 | 60.9 | 73.2 | 81.4 | 60.6 | 73.9 | 77.1 | 57.5 | 68.6 | 71.4 |
|                              |       | S  | 2.3  | 3.5  | 10.8 | 1.4  | 1.8  | 1.2  | 1.9  | 1.7  | 5.2  | 2.3  | 4.0  | 12.2 |
|                              |       | I  | 30.7 | 23.7 | 12.5 | 37.7 | 25.0 | 17.4 | 37.6 | 24.4 | 17.7 | 40.2 | 27.4 | 16.4 |
| Peak Time                    | CMIP6 | M  | 55.7 | 64.9 | 74.7 | 50.7 | 62.4 | 72.8 | 55.7 | 66.8 | 74.2 | 59.8 | 68.7 | 81.4 |
|                              |       | S  | 2.0  | 0.8  | 4.6  | 1.0  | 1.0  | 2.6  | 0.2  | 0.5  | 3.5  | 1.7  | 0.4  | 1.2  |
|                              |       | I  | 42.3 | 34.3 | 20.7 | 48.3 | 36.6 | 24.6 | 44.0 | 32.7 | 22.3 | 38.5 | 30.9 | 17.4 |
|                              | CMIP5 | M  | 50.4 | 56.6 | 63.8 | 52.8 | 64.1 | 78.1 | 58.4 | 55.9 | 67.2 | 51.6 | 56.4 | 65.8 |
|                              |       | S  | 0.5  | 2.3  | 13.4 | 1.3  | 1.1  | 2.2  | 0.4  | 0.1  | 5.1  | 0.2  | 3.4  | 11.9 |
|                              |       | I  | 49.1 | 41.1 | 22.8 | 45.9 | 34.7 | 19.7 | 41.2 | 44.0 | 27.7 | 48.3 | 40.2 | 22.4 |

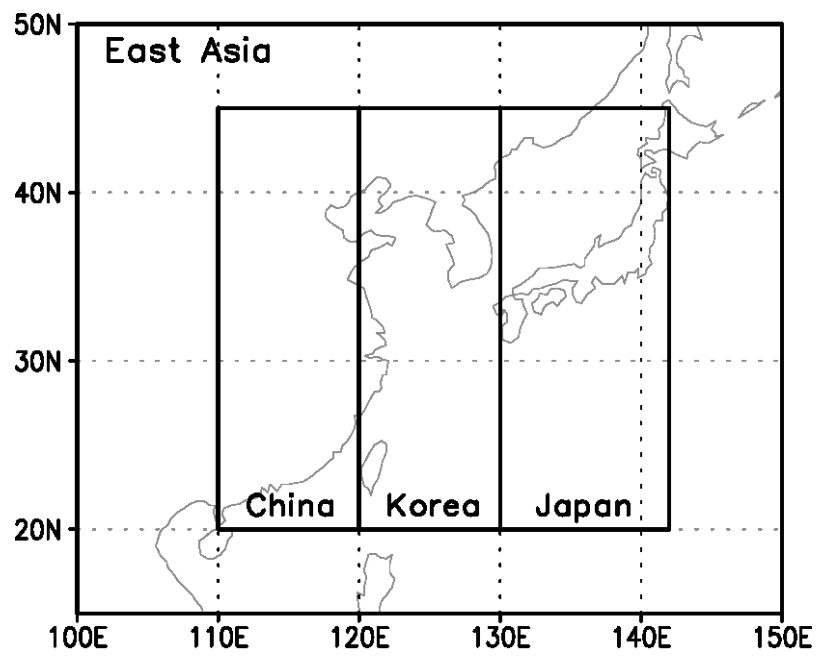

**Figure S1.** Geographical location of the East Asian domain and three subregions—China, Korea, and Japan—analyzed in this study

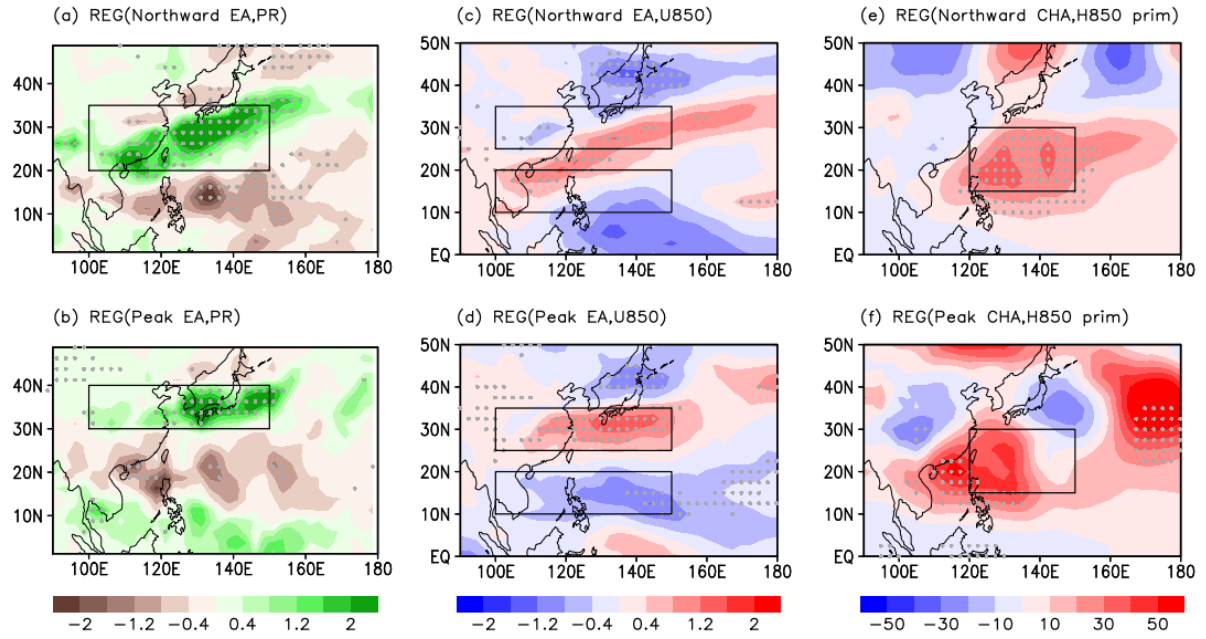

**Figure S2. Regression of (a, b) precipitation, (c, d) 850hPa eddy geopotential height and (e, f) 850hPa zonal wind onto (a, c, e) northward period and (b, d, f) peak time precipitation index over East Asia, respectively. Gray dots indicate grids with statistically significant correlation at the 5% significance level. The black rectangle in (a) and (b) represents the northward and peak time precipitation area, respectively. The two black rectangles in (c) and (d) indicate the regions for calculating the western North Pacific subtropical high index. The black rectangles in (e) and (f) indicate the region for calculating the East Asia summer monsoon index**

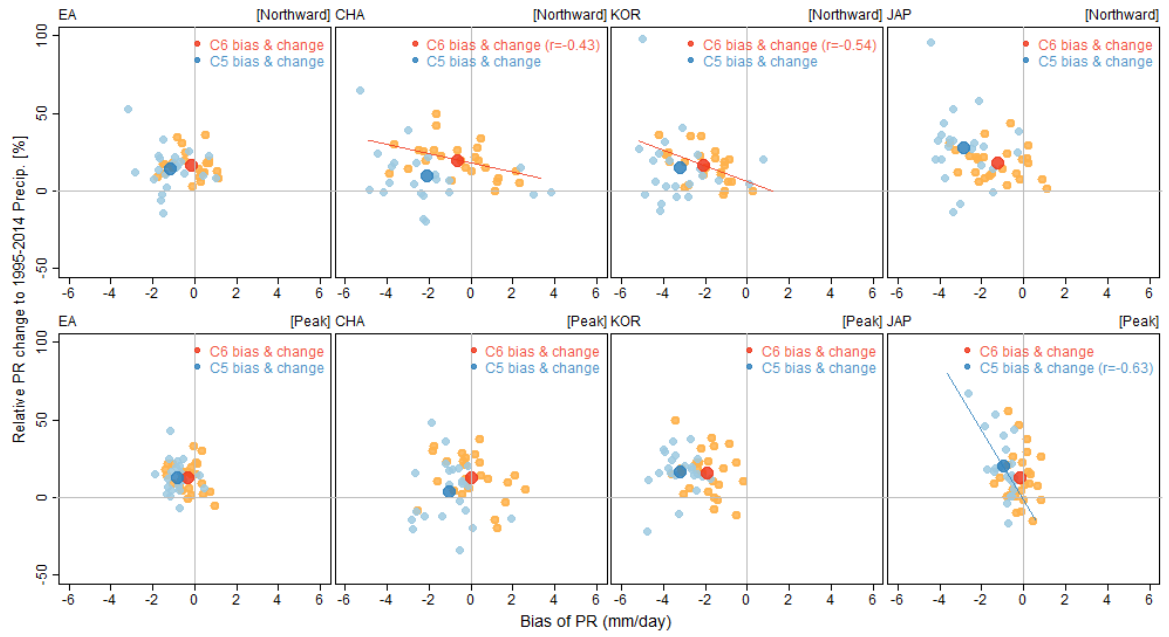

**Figure S3. Scatter plot of the association between model biases in precipitation (PR) and its future projections for the long term period (2081–2100) when using the SSP5-8.5 scenario in CMIP6 (orange) and RCP8.5 scenario in CMIP5 (blue). Biases were calculated relative to the observed precipitation data for the 1995–2014 period. Different graphs present the results of models analyzing the Eastern Asian (EA) domain and the subregions of China (CHA), Korea (KOR), and Japan (JAP). Correlation coefficients ( $r$ ) are provided in case of statistical significant linear regression at the 10% level.**

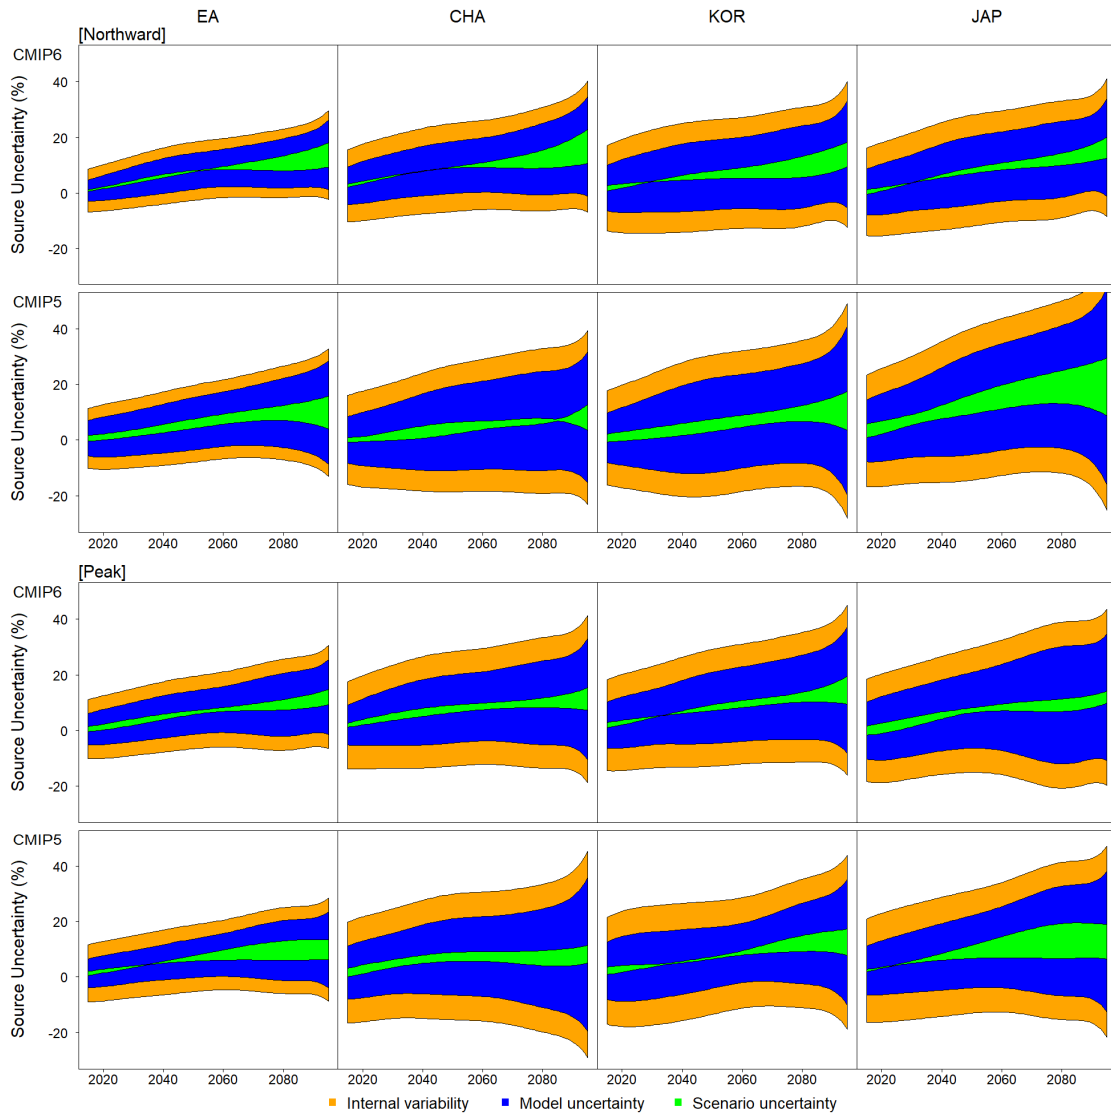

**Figure S4. Source of uncertainty in the multi-model multi-scenario mean projection change over East Asia (EA), China (CHA), Korea (KOR), and Japan (JAP) for the northward migration (upper two panels) and the peak time (bottom two panels) of the monsoon band. The top panel in each of these two sets illustrates CMIP6 results, while the bottom panel contains CMIP5 results.**



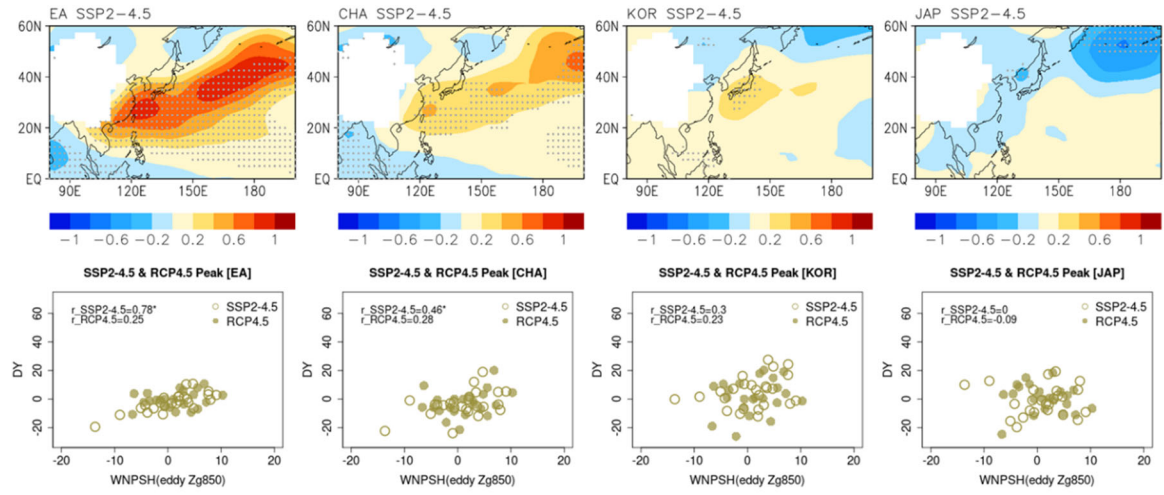

**Figure S5. (upper) Inter-model regression of future change 850hPa eddy geopotential height onto the dynamic term of SSP2-4.5 scenario from 25 CMIP6 model for 2081-2100. (bottom) Scatter plot of WNPSH (x-axis) and dynamic term (y-axis) from 25 CMIP6 model (open circle) and 22 CMIP5 model (closed circle). Inter-model correlation is provided and asterisk indicates significant correlation at 5% level.**
